# Supplementary material
Source: publisher figshare collection journal article supplement (https://gsajournals.figshare.com/ndownloader/files/13515338)
Supplement: Supplementary file 1 [file 13515338]

## Sheet: Sheet1
Table S1. Comparison between HR donors
Donor template	Insert size	Sequence accuracy	Efficiency	Pup viability	Genotyping	Ref
				(litter size)	PCR and Seq
Long dsDNA (Plasmid/Fragment*)	long	good	~20%	medium (2.5-4)	hard	a
short ssDNA (Oligo)	short	low	~30%	poor (2.6)	easy	b
Long ssDNA (ivTRT)	long	good	>50%	good (6.4)	easy	c
a) (Rong et al., 2014; Yang et al., 2013)
b) (Chen et al., 2011; Mali et al., 2013; Ran et al., 2013; Richardson et al., 2016; Wang et al., 2013; Yang et al., 2013); this study
c) (Miura et al., 2015); this study
* nickase in Human ES cells
